# Supplementary material
Source: PubMed Central journal article supplement (PMC5971138)
Supplement: NIHMS952280-supplement.pdf [file NIHMS952280-supplement.pdf]

**Supplemental Table 1. Percent of samples with detectable levels of inflammatory proteins and coefficients of variation (CVs) and intraclass correlation coefficients (ICCs)**

| Analyte                               | Overall            |       |      |
|---------------------------------------|--------------------|-------|------|
|                                       | Total % Detectable | CV    | ICC  |
| Adiponectin                           | 100.0              | 54.88 | 0.39 |
| CCL11                                 | 100.0              | 8.83  | 0.93 |
| CCL13                                 | 25.3               | 27.30 | 0.46 |
| CCL15                                 | 99.4               | 14.74 | 0.93 |
| CCL17                                 | 100.0              | 5.62  | 0.99 |
| CCL19                                 | 100.0              | 14.26 | 0.92 |
| CCL2                                  | 100.0              | 8.07  | 0.93 |
| CCL20                                 | 85.6               | 14.04 | 0.97 |
| CCL20 (high-sensitivity) <sup>†</sup> | 99.6               | 8.96  | 0.97 |
| CCL21                                 | 64.3               | 30.15 | 0.62 |
| CCL22                                 | 100.0              | 8.78  | 0.92 |
| CCL24                                 | 100.0              | 11.68 | 0.92 |
| CCL27                                 | 100.0              | 5.05  | 0.97 |
| CCL3                                  | 96.9               | 15.00 | 0.83 |
| CCL4                                  | 96.3               | 13.06 | 0.91 |
| CCL8                                  | 97.7               | 8.34  | 0.96 |
| CFD                                   | 100.0              | 50.83 | 0.11 |
| CRP                                   | 99.8               | 13.39 | 0.99 |
| CX3CL1                                | 97.9               | 18.99 | 0.69 |
| CXCL1,2,3                             | 99.8               | 11.29 | 0.94 |
| CXCL10                                | 100.0              | 6.41  | 0.98 |
| CXCL11                                | 99.6               | 13.16 | 0.95 |
| CXCL12                                | 99.8               | 26.44 | 0.68 |
| CXCL13                                | 99.8               | 10.55 | 0.95 |
| CXCL5                                 | 100.0              | 5.05  | 0.99 |
| CXCL6                                 | 100.0              | 23.12 | 0.78 |
| CXCL9                                 | 100.0              | 11.71 | 0.97 |
| EGF                                   | 86.4               | 13.04 | 0.95 |
| G-CSF                                 | 60.8               | 27.86 | 0.72 |
| GM-CSF                                | 96.9               | 19.72 | 0.88 |
| IL-10                                 | 98.1               | 22.95 | 0.84 |
| IL-12 (p70)                           | 98.8               | 16.03 | 0.91 |
| IL-13                                 | 91.5               | 15.96 | 0.91 |
| IL-16                                 | 58.3               | 28.91 | 0.72 |
| IL-17A                                | 96.5               | 24.78 | 0.78 |
| IL-1B                                 | 95.6               | 20.94 | 0.84 |
| IL-21                                 | 91.5               | 32.81 | 0.74 |
| IL-23                                 | 97.5               | 26.15 | 0.76 |
| IL-29                                 | 21.6               | 20.60 | 0.78 |
| IL-33                                 | 18.5               | 26.73 | 0.90 |
| IL-4                                  | 90.2               | 20.74 | 0.76 |
| IL-5                                  | 96.3               | 32.03 | 0.64 |
| IL-6                                  | 99.8               | 18.03 | 0.95 |
| IL-7                                  | 99.8               | 16.84 | 0.77 |
| IL-8                                  | 100.0              | 12.75 | 0.97 |
| NGAL                                  | 99.4               | 51.60 | 0.29 |
| PAI-1                                 | 99.0               | 35.55 | 0.33 |
| RETN                                  | 98.8               | 35.86 | 0.57 |
| sEGFR                                 | 99.8               | 8.14  | 0.77 |
| SAA                                   | 99.8               | 10.65 | 0.99 |
| sICAM-1                               | 99.8               | 8.24  | 0.97 |
| sIL-4R                                | 99.6               | 10.43 | 0.85 |
| sIL-RII                               | 99.8               | 7.65  | 0.95 |
| STNFR1                                | 99.8               | 7.71  | 0.94 |
| sTNFR2                                | 99.8               | 6.46  | 0.97 |
| sVCAM-1                               | 99.8               | 8.58  | 0.92 |
| sVEGFR3                               | 95.9               | 17.96 | 0.85 |
| TNF-a                                 | 100.0              | 13.29 | 0.91 |
| TRAIL                                 | 92.4               | 17.56 | 0.87 |
| TSLP                                  | 9.2                | 21.05 | 0.93 |

|      |      |       |      |
|------|------|-------|------|
| VEGF | 73.9 | 29.76 | 0.80 |
|------|------|-------|------|

†CCL20 was measured on both the Milliplex cytokine panel 3 and high-sensitivity panel
